# Supplementary material for: Physical activity behaviour up to 1 year post-rehabilitation among adults with physical disabilities and/or chronic diseases: results of the prospective cohort study ReSpAct
Source: HighWire-hosted journal article supplement (doi:10.1136/bmjopen-2021-056832), 2022-06-01
Supplement: bmjopen-2021-056832supp003_data_supplement.pdf [file bmjopen-2021-056832supp003_data_supplement.pdf]

**Appendix 3.** Effect modification of personal characteristics and diagnosis on the development of physical activity behavior

|                     |                               | Total PA |       |         | Leisure time |       |         | Household |       |         | Work    |       |         | Commuting |      |         | MVPA    |       |         |
|---------------------|-------------------------------|----------|-------|---------|--------------|-------|---------|-----------|-------|---------|---------|-------|---------|-----------|------|---------|---------|-------|---------|
|                     |                               | $\beta$  | SE    | P-value | $\beta$      | SE    | P-value | $\beta$   | SE    | P-value | $\beta$ | SE    | P-value | $\beta$   | SE   | P-value | $\beta$ | SE    | P-value |
| Diagnosis           | (Intercept)                   | 1676.4   | 76.2  | >.001   | 63.3         | 37.2  | >.001   | 626.7     | 37.7  | >.001   | 373.9   | 43.0  | >.001   | 64.5      | 13.5 | >.001   | 654.7   | 44.9  | >.001   |
| Brain disease (ref) | t1                            | 223.9    | 74.2  | .003    | 67.6         | 41.9  | .107    | -6.3      | 4.2   | .876    | 144.5   | 4.1   | >.001   | 17.5      | 18.0 | .332    | 132.7   | 46.4  | .004    |
|                     | t2                            | 211.7    | 78.3  | .007    | -23.7        | 44.0  | .590    | 7.4       | 42.2  | .861    | 172.2   | 42.7  | >.001   | 59.8      | 18.9 | .002    | 147.5   | 49.0  | .003    |
|                     | t3                            | 144.1    | 80.6  | .074    | 29.9         | 45.5  | .512    | -29.2     | 43.2  | .500    | 128.7   | 43.7  | .003    | 7.5       | 19.5 | .701    | 105.0   | 5.4   | .037    |
|                     | Musculoskeletal disorder      | 307.5    | 109.6 | .005    | -62.1        | 55.9  | .267    | 181.4     | 58.9  | .002    | 20.4    | 67.4  | .003    | -7.1      | 21.2 | .736    | -54.6   | 7.4   | .438    |
|                     | Chronic pain                  | 164.6    | 114.8 | .152    | -79.4        | 58.6  | .176    | 169.0     | 61.9  | .006    | 75.6    | 7.8   | .285    | 4.3       | 22.3 | .845    | -246.1  | 74.1  | .001    |
|                     | Neurologic disease            | 12.9     | 117.0 | .913    | -29.8        | 59.9  | .618    | 45.5      | 63.0  | .470    | 36.8    | 72.3  | .611    | -19.7     | 22.7 | .385    | -104.7  | 75.4  | .165    |
|                     | Organ disease                 | 129.3    | 128.1 | .313    | 43.7         | 64.9  | .501    | 73.3      | 68.0  | .281    | 38.2    | 77.6  | .622    | -19.0     | 24.5 | .438    | 127.1   | 8.9   | .116    |
|                     | Amputation                    | -122.4   | 184.0 | .506    | 344.3        | 94.5  | >.001   | -205.0    | 10.4  | .041    | -201.0  | 114.1 | .078    | -45.6     | 35.6 | .201    | -137.5  | 118.7 | .247    |
|                     | Spinal cord injury            | 27.8     | 219.6 | .899    | 19.5         | 112.2 | .862    | -118.7    | 118.1 | .315    | 67.9    | 135.8 | .617    | 3.6       | 42.6 | .472    | -165.4  | 141.9 | .244    |
|                     | Other diseases                | 392.7    | 197.8 | .047    | 15.9         | 101.1 | .875    | 244.9     | 106.5 | .021    | 106.7   | 121.9 | .382    | 1.6       | 38.4 | .783    | -2.6    | 127.9 | .984    |
|                     | t1 * Musculoskeletal disorder | 38.1     | 116.8 | .744    | 15.4         | 66.0  | .815    | 35.0      | 62.9  | .578    | -54.5   | 63.1  | .388    | 4.2       | 28.3 | .157    | -39.0   | 73.0  | .593    |
|                     | t2 * Musculoskeletal disorder | 36.5     | 123.6 | .768    | 5.4          | 69.6  | .470    | -32.2     | 66.6  | .629    | 66.7    | 67.2  | .321    | -44.5     | 29.8 | .136    | -6.6    | 77.3  | .433    |
|                     | t3 * Musculoskeletal disorder | 70.5     | 128.6 | .584    | 27.9         | 72.8  | .702    | -63.0     | 69.1  | .362    | 71.6    | 69.3  | .302    | 4.6       | 3.9  | .189    | -3.5    | 8.4   | .965    |
|                     | t1 * Chronic pain             | 6.6      | 122.0 | .957    | -1.1         | 69.2  | .987    | 114.3     | 66.0  | .084    | -69.0   | 65.6  | .293    | -15.0     | 29.7 | .613    | -6.7    | 76.2  | .426    |
|                     | t2 * Chronic pain             | -20.1    | 130.1 | .877    | 66.7         | 73.2  | .363    | 72.7      | 7.2   | .300    | -71.1   | 7.5   | .314    | -81.0     | 31.4 | .010    | -8.2    | 81.4  | .919    |
|                     | t3 * Chronic pain             | -118.9   | 135.0 | .379    | -43.8        | 76.4  | .566    | 17.3      | 72.4  | .811    | -52.6   | 73.0  | .471    | -28.4     | 32.5 | .383    | -21.9   | 84.4  | .796    |
|                     | t1 * Neurologic disease       | -114.5   | 123.1 | .352    | -73.0        | 69.7  | .295    | 66.7      | 66.3  | .315    | -99.8   | 66.9  | .136    | -18.0     | 29.9 | .548    | -12.9   | 76.9  | .116    |
|                     | t2 * Neurologic disease       | -11.6    | 128.4 | .928    | 121.0        | 72.6  | .096    | 35.0      | 69.0  | .612    | -141.7  | 69.9  | .043    | -36.8     | 31.1 | .236    | -4.5    | 8.3   | .614    |
|                     | t3 * Neurologic disease       | -176.5   | 131.8 | .181    | -105.8       | 74.6  | .156    | -2.4      | 7.8   | .973    | -75.6   | 71.5  | .290    | 13.2      | 31.9 | .679    | -8.7    | 82.4  | .327    |
|                     | t1 * Organ disease            | -94.0    | 131.9 | .476    | 5.0          | 74.6  | .947    | -3.8      | 71.6  | .957    | -134.6  | 71.8  | .061    | 2.7       | 32.1 | .520    | 28.7    | 82.4  | .728    |
|                     | t2 * Organ disease            | 76.0     | 138.5 | .583    | 49.4         | 78.3  | .528    | 24.3      | 74.9  | .745    | -9.6    | 75.5  | .899    | -5.8      | 33.6 | .862    | 111.6   | 86.5  | .197    |
|                     | t3 * Organ disease            | 181.2    | 144.4 | .209    | 96.5         | 81.6  | .237    | 2.6       | 77.8  | .792    | 5.5     | 78.8  | .522    | 38.2      | 35.3 | .279    | 154.0   | 9.3   | .088    |
|                     | t1 * Amputation               | 365.9    | 193.8 | .059    | -36.5        | 11.3  | .741    | 162.9     | 105.2 | .122    | 16.4    | 107.1 | .134    | 85.2      | 47.0 | .070    | 84.4    | 121.1 | .486    |
|                     | t2 * Amputation               | 317.9    | 201.1 | .114    | -129.2       | 113.6 | .255    | 319.9     | 108.7 | .003    | 121.6   | 109.7 | .268    | -2.6      | 48.6 | .671    | 44.6    | 125.7 | .722    |
|                     | t3 * Amputation               | 359.5    | 211.7 | .090    | -114.4       | 12.5  | .343    | 203.2     | 114.4 | .076    | 165.1   | 115.8 | .154    | 115.8     | 51.3 | .024    | 156.8   | 132.4 | .236    |

|            |                                 |        |       |                 |        |       |                 |        |       |                 |        |       |                 |       |      |                 |        |       |                 |
|------------|---------------------------------|--------|-------|-----------------|--------|-------|-----------------|--------|-------|-----------------|--------|-------|-----------------|-------|------|-----------------|--------|-------|-----------------|
|            | t1 * Spinal cord injury         | -18.7  | 242.1 | .938            | 86.9   | 136.3 | .524            | 99.0   | 129.4 | .445            | -197.9 | 129.8 | .128            | -22.0 | 58.4 | .706            | -26.9  | 151.3 | .859            |
|            | t2 * Spinal cord injury         | 271.2  | 252.1 | .282            | 304.2  | 143.4 | <b>.034</b>     | 171.0  | 134.8 | .205            | -152.5 | 136.6 | .264            | -44.9 | 6.5  | .458            | -74.2  | 157.7 | .638            |
|            | t3 * Spinal cord injury         | 113.3  | 262.6 | .666            | 142.8  | 149.6 | .340            | 126.4  | 144.5 | .382            | 2.7    | 143.2 | .985            | -62.1 | 62.8 | .323            | 49.2   | 164.3 | .765            |
|            | t1 * Spinal cord injury         | 10.7   | 211.3 | .960            | -67.1  | 119.0 | .573            | -86.2  | 112.9 | .446            | 179.4  | 113.4 | .114            | -17.6 | 51.1 | .731            | 32.1   | 132.0 | .808            |
|            | t2 * Spinal cord injury         | -83.8  | 211.5 | .692            | -113.2 | 119.8 | .345            | 67.9   | 113.0 | .548            | 45.8   | 113.7 | .687            | -88.1 | 51.2 | .085            | -122.4 | 132.1 | .354            |
|            | t3 * Spinal cord injury         | 96.1   | 234.1 | .681            | -44.0  | 131.5 | .738            | -54.1  | 125.0 | .665            | 91.6   | 125.5 | .465            | 97.4  | 56.2 | .083            | -73.8  | 146.4 | .614            |
|            | Type III ANOVA Diagnosis        |        |       | <b>.001</b>     |        |       | <b>&gt;.001</b> |        |       | <b>&gt;.001</b> |        |       | <b>.001</b>     |       |      | .311            |        |       | <b>&gt;.001</b> |
|            | Type III ANOVA Time * Diagnosis |        |       | .612            |        |       | .263            |        |       | .493            |        |       | .105            |       |      | <b>.041</b>     |        |       | .860            |
| Age        | (Intercept)                     | 2429.2 | 142.5 | <b>&gt;.001</b> | 446.2  | 73.9  | <b>&gt;.001</b> | 846.2  | 77.6  | <b>&gt;.001</b> | 1006.4 | 87.5  | <b>&gt;.001</b> | 115.2 | 27.7 | <b>&gt;.001</b> | -96.0  | 91.7  | .296            |
|            | t1                              | 436.5  | 152.0 | <b>.004</b>     | 84.4   | 86.4  | .329            | 85.6   | 81.7  | .295            | 258.6  | 81.9  | <b>.002</b>     | 66.1  | 37.0 | .074            | 21.9   | 95.0  | .818            |
|            | t2                              | 589.1  | 164.0 | <b>&gt;.001</b> | 69.4   | 93.0  | .455            | 104.4  | 88.1  | .236            | 428.8  | 88.9  | <b>&gt;.001</b> | 23.1  | 39.7 | .560            | 78.2   | 102.6 | .446            |
|            | t3                              | 416.5  | 169.0 | <b>.014</b>     | -16.7  | 96.5  | .863            | 4.1    | 9.8   | .964            | 441.2  | 91.4  | <b>&gt;.001</b> | 34.8  | 4.9  | .395            | -2.2   | 105.7 | .983            |
|            | Age                             | -12.7  | 2.7   | <b>&gt;.001</b> | 3.5    | 1.4   | <b>.012</b>     | -2.9   | 1.5   | <b>.049</b>     | -11.4  | 1.6   | <b>&gt;.001</b> | -1.1  | .5   | <b>.033</b>     | 13.5   | 1.7   | <b>&gt;.001</b> |
|            | t1 * Age                        | -4.2   | 2.9   | .143            | -.5    | 1.6   | .750            | -1.0   | 1.6   | .529            | -3.1   | 1.6   | <b>.046</b>     | -0.8  | .7   | .250            | 1.6    | 1.8   | .372            |
|            | t2 * Age                        | -6.7   | 3.1   | <b>.031</b>     | -1.0   | 1.8   | .567            | -1.1   | 1.7   | .492            | -5.4   | 1.7   | <b>.001</b>     | 0.1   | .8   | .919            | 1.1    | 1.9   | .556            |
|            | t3 * Age                        | -5.1   | 3.2   | .113            | 0.7    | 1.8   | .708            | -0.6   | 1.7   | .728            | -5.9   | 1.7   | <b>.001</b>     | -0.2  | .8   | .797            | 2.2    | 2.0   | .271            |
|            | Type III ANOVA Time * Age       |        |       | .145            |        |       | .839            |        |       | .894            |        |       | <b>.002</b>     |       |      | .618            |        |       | .696            |
| Sex        | (Intercept)                     | 1642.7 | 59.1  | <b>&gt;.001</b> | 619.5  | 25.7  | <b>&gt;.001</b> | 461.8  | 27.6  | <b>&gt;.001</b> | 453.3  | 39.9  | <b>&gt;.001</b> | 54.7  | 1.3  | <b>&gt;.001</b> | 69.9   | 39.4  | <b>&gt;.001</b> |
| Male (ref) | t1                              | 265.0  | 55.9  | <b>&gt;.001</b> | 61.9   | 25.6  | <b>.016</b>     | 48.9   | 3.2   | .105            | 113.8  | 3.4   | <b>&gt;.001</b> | 36.5  | 13.6 | <b>.007</b>     | 172.0  | 34.8  | <b>&gt;.001</b> |
|            | t2                              | 285.5  | 58.8  | <b>&gt;.001</b> | 29.6   | 26.7  | .268            | 93.6   | 31.7  | <b>.003</b>     | 147.8  | 32.1  | <b>&gt;.001</b> | 4.1   | 14.3 | <b>.005</b>     | 183.8  | 36.7  | <b>&gt;.001</b> |
|            | t3                              | 235.0  | 60.5  | <b>&gt;.001</b> | 4.8    | 27.8  | .142            | 32.5   | 32.5  | .318            | 138.9  | 32.9  | <b>&gt;.001</b> | 51.1  | 14.7 | <b>.001</b>     | 195.5  | 37.8  | <b>&gt;.001</b> |
|            | Female                          | 273.9  | 73.0  | <b>&gt;.001</b> | -22.4  | 51.6  | .665            | 45.4   | 37.9  | <b>&gt;.001</b> | -45.7  | 45.4  | .314            | 6.2   | 14.2 | .664            | -203.1 | 46.9  | <b>&gt;.001</b> |
|            | t1 * Female                     | -87.6  | 77.3  | .257            | 17.0   | 6.0   | .776            | -24.6  | 41.7  | .555            | -25.9  | 42.0  | .537            | -22.8 | 18.8 | .225            | -128.3 | 48.2  | <b>.008</b>     |
|            | t2 * Female                     | -81.9  | 81.2  | .313            | -8.0   | 63.9  | .901            | -93.6  | 43.7  | <b>.032</b>     | 7.7    | 44.2  | .862            | -25.9 | 19.7 | .189            | -86.1  | 5.7   | .089            |
|            | t3 * Female                     | -155.2 | 84.5  | .066            | -78.5  | 66.9  | .241            | -107.9 | 45.4  | <b>.018</b>     | -2.7   | 45.9  | .953            | -53.0 | 2.5  | <b>.010</b>     | -161.9 | 52.7  | <b>.002</b>     |
|            | Type III ANOVA Time * Sex       |        |       | .314            |        |       | .633            |        |       | <b>.045</b>     |        |       | .887            |       |      | .080            |        |       | <b>.009</b>     |
| BMI        | (Intercept)                     | 2008.8 | 135.0 | <b>&gt;.001</b> | 668.2  | 68.1  | <b>&gt;.001</b> | 768.1  | 71.9  | <b>&gt;.001</b> | 553.0  | 81.9  | <b>&gt;.001</b> | 5.2   | 24.2 | <b>.038</b>     | 643.7  | 86.8  | <b>&gt;.001</b> |
|            | t1                              | 346.7  | 133.3 | <b>.009</b>     | 101.3  | 75.6  | .180            | 55.3   | 71.9  | .442            | 155.6  | 7.9   | <b>.028</b>     | 31.1  | 31.4 | .322            | 131.2  | 82.7  | .113            |
|            | t2                              | 204.6  | 137.1 | .136            | 87.2   | 77.5  | .260            | -72.7  | 74.0  | .326            | 139.3  | 73.3  | .058            | 54.8  | 32.2 | .089            | 116.8  | 85.1  | .170            |

|                  |                                        |        |       |                 |        |       |                 |        |       |                 |        |       |                 |       |      |                 |        |       |                 |
|------------------|----------------------------------------|--------|-------|-----------------|--------|-------|-----------------|--------|-------|-----------------|--------|-------|-----------------|-------|------|-----------------|--------|-------|-----------------|
|                  | t3                                     | 62.4   | 140.5 | .657            | 96.6   | 79.5  | .224            | -173.9 | 75.8  | <b>.022</b>     | 146.5  | 74.9  | .051            | 12.7  | 33.0 | .700            | 72.3   | 87.2  | .407            |
|                  | BMI                                    | -8.8   | 4.5   | <b>.049</b>     | -1.9   | 2.3   | .403            | -2.4   | 2.4   | .331            | -4.8   | 2.7   | .079            | 0.2   | .8   | .816            | -2.5   | 2.9   | .398            |
|                  | t1 * BMI                               | -4.0   | 4.6   | .384            | -1.4   | 2.6   | .605            | -0.8   | 2.5   | .760            | -1.6   | 2.5   | .518            | -0.4  | 1.1  | .742            | -0.8   | 2.9   | .771            |
|                  | t2 * BMI                               | 1.9    | 4.7   | .692            | -2.1   | 2.7   | .441            | 4.3    | 2.6   | .093            | 0.4    | 2.5   | .861            | -1.1  | 1.1  | .338            | 0.8    | 2.9   | .791            |
|                  | t3 * BMI                               | 3.4    | 4.9   | .490            | -2.5   | 2.7   | .356            | 5.4    | 2.6   | <b>.038</b>     | -0.4   | 2.6   | .875            | 0.2   | 1.1  | .859            | 1.4    | 3.0   | .651            |
|                  | Type III ANOVA Time * BMI              |        |       | .457            |        |       | .800            |        |       | <b>.042</b>     |        |       | .870            |       |      | .703            |        |       | .898            |
| Smoking behavior | (Intercept)                            | 1758.6 | 59.7  | <b>&gt;.001</b> | 619.5  | 25.7  | <b>&gt;.001</b> | 689.0  | 27.3  | <b>&gt;.001</b> | 422.9  | 33.9  | <b>&gt;.001</b> | 55.3  | 8.2  | <b>&gt;.001</b> | 589.3  | 35.3  | <b>&gt;.001</b> |
| No (ref)         | t1                                     | 244.3  | 44.9  | <b>&gt;.001</b> | 61.9   | 25.6  | <b>.016</b>     | 38.9   | 24.2  | .107            | 114.5  | 24.4  | <b>&gt;.001</b> | 21.3  | 1.7  | <b>.047</b>     | 111.1  | 28.0  | <b>&gt;.001</b> |
|                  | t2                                     | 278.6  | 46.8  | <b>&gt;.001</b> | 29.6   | 26.7  | .268            | 47.4   | 25.2  | .060            | 162.3  | 25.6  | <b>&gt;.001</b> | 3.0   | 11.1 | <b>.007</b>     | 172.7  | 29.2  | <b>&gt;.001</b> |
|                  | t3                                     | 194.5  | 48.6  | <b>&gt;.001</b> | 4.8    | 27.8  | .142            | -14.8  | 26.1  | .570            | 143.8  | 26.5  | <b>&gt;.001</b> | 19.6  | 11.6 | .091            | 129.1  | 3.4   | <b>&gt;.001</b> |
|                  | Yes                                    | 9.9    | 99.4  | .921            | -22.4  | 51.6  | .665            | 42.8   | 54.2  | .430            | -14.2  | 61.6  | .817            | 2.4   | 18.8 | .898            | -89.4  | 64.1  | .163            |
|                  | t1 * Yes                               | 26.7   | 104.3 | .798            | 17.0   | 6.0   | .776            | 41.5   | 56.3  | .461            | -21.9  | 56.6  | .699            | 2.4   | 24.9 | .925            | 1.4    | 65.1  | .983            |
|                  | t2 * Yes                               | -113.2 | 111.8 | .311            | -8.0   | 63.9  | .901            | 25.1   | 6.2   | .677            | -87.0  | 6.5   | .150            | -3.5  | 26.5 | .250            | -212.3 | 69.8  | <b>.002</b>     |
|                  | t3 * Yes                               | -190.8 | 116.6 | .102            | -78.5  | 66.9  | .241            | -21.9  | 62.8  | .728            | -53.6  | 63.5  | .398            | -9.5  | 27.6 | .730            | -98.2  | 72.8  | .178            |
|                  | Type III ANOVA Time * Smoking behavior |        |       | .231            |        |       | .546            |        |       | .759            |        |       | .516            |       |      | .621            |        |       | <b>.008</b>     |
| Alcohol use      | (Intercept)                            | 1764.2 | 63.9  | <b>&gt;.001</b> | 594.5  | 28.8  | <b>&gt;.001</b> | 727.2  | 31.2  | <b>&gt;.001</b> | 409.9  | 37.3  | <b>&gt;.001</b> | 58.6  | 9.6  | <b>&gt;.001</b> | 533.2  | 37.8  | <b>&gt;.001</b> |
| No (ref)         | t1                                     | 239.0  | 53.1  | <b>&gt;.001</b> | 56.5   | 3.4   | .063            | 53.1   | 28.6  | .064            | 9.8    | 28.9  | <b>.002</b>     | 29.7  | 12.7 | <b>.019</b>     | 103.9  | 33.2  | <b>.002</b>     |
|                  | t2                                     | 206.2  | 55.5  | <b>&gt;.001</b> | 18.7   | 31.7  | .555            | 37.8   | 29.9  | .206            | 13.0   | 3.3   | <b>&gt;.001</b> | 1.6   | 13.2 | .423            | 96.5   | 34.6  | <b>.005</b>     |
|                  | t3                                     | 93.8   | 57.6  | .103            | -12.4  | 33.0  | .706            | -24.3  | 3.9   | .433            | 105.6  | 31.3  | <b>.001</b>     | 19.2  | 13.7 | .161            | 63.8   | 36.0  | .076            |
|                  | Light                                  | -89.9  | 122.9 | .465            | -3.0   | 63.5  | .962            | -138.1 | 66.8  | <b>.039</b>     | 59.2   | 76.7  | .441            | -23.7 | 23.5 | .312            | -25.4  | 79.1  | .748            |
|                  | Moderate                               | 86.8   | 89.8  | .334            | 107.4  | 46.5  | <b>.021</b>     | -39.9  | 48.9  | .415            | 33.6   | 55.8  | .547            | 0.2   | 17.0 | .992            | 175.0  | 57.8  | <b>.002</b>     |
|                  | Excessive                              | -614.7 | 247.9 | <b>.013</b>     | -291.6 | 128.0 | <b>.023</b>     | -85.4  | 136.1 | .530            | -244.3 | 155.4 | .116            | -13.3 | 47.6 | .780            | -164.1 | 159.4 | .304            |
|                  | t1 * Light                             | 134.5  | 129.4 | .299            | 11.0   | 73.9  | .882            | 88.1   | 69.6  | .206            | 81.5   | 7.4   | .247            | -24.9 | 31.0 | .422            | -19.6  | 8.7   | .808            |
|                  | t2 * Light                             | 360.2  | 134.1 | <b>.007</b>     | 124.6  | 76.6  | .104            | 82.9   | 72.4  | .252            | 105.5  | 73.2  | .149            | 82.3  | 32.0 | <b>.010</b>     | 174.9  | 83.7  | <b>.037</b>     |
|                  | t3 * Light                             | 331.1  | 139.7 | <b>.018</b>     | 202.3  | 8.5   | <b>.012</b>     | 49.0   | 75.0  | .514            | 128.5  | 76.9  | .095            | 18.2  | 33.4 | .586            | 13.0   | 87.2  | .136            |
|                  | t1 * Moderate                          | -31.8  | 93.5  | .734            | 14.9   | 53.7  | .781            | -65.7  | 5.5   | .193            | 33.8   | 5.8   | .505            | -11.1 | 22.4 | .619            | 25.9   | 58.4  | .658            |
|                  | t2 * Moderate                          | 42.0   | 99.0  | .671            | -21.7  | 56.6  | .701            | 25.7   | 53.2  | .629            | 4.9    | 53.9  | .928            | 17.3  | 23.5 | .462            | 67.5   | 61.8  | .275            |
|                  | t3 * Moderate                          | 56.8   | 102.9 | .581            | 34.8   | 58.7  | .553            | -9.7   | 55.3  | .861            | 32.4   | 55.8  | .562            | -12.5 | 24.5 | .608            | 85.6   | 64.2  | .183            |
|                  | t1 * Excessive                         | 147.2  | 254.5 | .563            | 119.4  | 145.1 | .411            | 0.4    | 137.7 | .998            | 84.2   | 141.3 | .551            | -62.3 | 61.4 | .310            | 11.9   | 158.8 | .485            |

|                 |                                       |        |       |                 |       |       |                 |        |       |                 |       |       |                 |      |      |                 |       |       |                 |
|-----------------|---------------------------------------|--------|-------|-----------------|-------|-------|-----------------|--------|-------|-----------------|-------|-------|-----------------|------|------|-----------------|-------|-------|-----------------|
|                 | t2 * Excessive                        | 78.4   | 272.9 | .774            | 68.6  | 155.2 | .658            | -116.3 | 148.7 | .434            | 202.6 | 149.4 | .175            | -0.8 | 65.9 | .990            | 169.6 | 17.4  | .319            |
|                 | t3 * Excessive                        | 716.7  | 298.2 | <b>.016</b>     | 347.4 | 169.3 | <b>.040</b>     | 121.5  | 163.3 | .457            | 311.3 | 167.9 | .064            | 6.6  | 71.9 | .927            | 586.4 | 186.2 | <b>.002</b>     |
|                 | Type III ANOVA Alcohol use            |        |       | .064            |       |       | <b>.001</b>     |        |       | .308            |       |       | .112            |      |      | .847            |       |       | <b>&gt;.001</b> |
|                 | Type III ANOVA Time * Alcohol use     |        |       | .074            |       |       | .157            |        |       | .514            |       |       | .586            |      |      | .145            |       |       | <b>.040</b>     |
| Education level | (Intercept)                           | 1758.9 | 61.4  | <b>&gt;.001</b> | 634.4 | 27.4  | <b>&gt;.001</b> | 723.4  | 27.9  | <b>&gt;.001</b> | 373.2 | 34.5  | <b>&gt;.001</b> | 55.3 | 8.2  | <b>&gt;.001</b> | 584.8 | 37.8  | <b>&gt;.001</b> |
| Low (ref)       | t1                                    | 216.2  | 46.9  | <b>&gt;.001</b> | 63.5  | 26.6  | <b>.017</b>     | 35.2   | 25.3  | .164            | 95.3  | 25.5  | <b>&gt;.001</b> | 22.5 | 1.9  | <b>.038</b>     | 114.0 | 29.1  | <b>&gt;.001</b> |
|                 | t2                                    | 197.8  | 49.1  | <b>&gt;.001</b> | 16.8  | 27.8  | .546            | 34.8   | 26.5  | .190            | 13.4  | 26.8  | <b>&gt;.001</b> | 16.5 | 11.3 | .147            | 127.8 | 3.6   | <b>&gt;.001</b> |
|                 | t3                                    | 90.2   | 50.8  | .076            | 6.0   | 28.9  | .834            | -36.6  | 27.3  | .181            | 112.1 | 27.6  | <b>&gt;.001</b> | 14.0 | 11.7 | .234            | 104.7 | 31.6  | <b>.001</b>     |
|                 | High                                  | 13.4   | 88.3  | .879            | -77.9 | 45.7  | .088            | -94.2  | 48.2  | .051            | 187.1 | 54.5  | <b>.001</b>     | 1.3  | 16.4 | .935            | -43.7 | 57.3  | .446            |
|                 | t1 * High                             | 100.0  | 92.6  | .280            | -1.1  | 52.6  | .984            | 24.1   | 5.0   | .629            | 66.9  | 49.9  | .180            | -4.7 | 21.5 | .826            | -24.7 | 57.6  | .668            |
|                 | t2 * High                             | 220.5  | 97.3  | <b>.024</b>     | 55.1  | 55.2  | .318            | 46.7   | 52.4  | .374            | 78.9  | 52.7  | .134            | 23.4 | 22.4 | .297            | 34.6  | 6.6   | .568            |
|                 | t3 * High                             | 260.9  | 102.1 | <b>.011</b>     | 84.1  | 58.0  | .147            | 53.1   | 55.0  | .335            | 94.9  | 55.1  | .085            | 15.6 | 23.5 | .506            | 21.7  | 63.5  | .733            |
|                 | Type III ANOVA Time * Education level |        |       | <b>.038</b>     |       |       | .375            |        |       | .749            |       |       | .284            |      |      | .581            |       |       | .791            |
